# Supplementary material
Source: publisher figshare collection journal article supplement (https://acs.figshare.com/ndownloader/files/4636474)
Supplement: Supplementary file 1 [file 4636474]

Supporting Information

One-Electron Reductive Template-Directed Ligation of Oligodeoxynucleotides  
Possessing Disulfide Bond

Kazuhito Tanabe,\* Emi Kuraseko, Yoshimi Yamamoto and Sei-ichi Nishimoto\*

Department of Energy and Hydrocarbon Chemistry, Graduate School of Engineering,  
Kyoto University, Katsura Campus, Kyoto 615-8510, Japan

\*corresponding author

Phone: +81-75-383-2500 FAX: +81-75-383-2501

e-mail: tanabeka@scl.kyoto-u.ac.jp, nishimot@scl.kyoto-u.ac.jp

## **Experimental Section**

### General Methods

Matrix-assisted laser desorption ionization time-of-flight (MALDI-TOF) mass spectrometry of oligonucleotides were obtained on JEOL LMS-ELITE MALDI-TOF MASS spectrometer with 2',3',4'-trihydroxyacetophenone as matrix. The oligonucleotides were purchased from Invitrogen. The reagents for DNA synthesizer such as A, T, G, C and thiol-modifier C6 S-S were purchased from Glen Research. Calf intestinal alkaline phosphatase (AP), nuclease P1 (P1) and phosphodiesterase I were purchased from PROMEGA, YAMASA and ICN, respectively. High-performance liquid chromatography (HPLC) was performed with Shimadzu 6A, HITACHI D-7000 or HITACHI L-2400 HPLC system. Sample solutions were injected on a reversed phase column (Inertsil ODS-3, GL Sciences Inc.,  $\phi$  4.6 mm  $\times$  150 mm or 10 mm  $\times$  150 mm). The solvent mixture of 0.1 M triethylamine acetate (TEAA), pH 7.0 and 100% acetonitrile was delivered as mobile phase at a flow rate of 0.6 mL or 3.0 mL / min at 25 °C. The column eluents were monitored by the UV absorbance at 254 nm or 260 nm. Rigaku RADIOFLEX-350 was used for X-radiolysis. Gel electrophoresis was carried out on a ATTO AE-6155 apparatus. All aqueous solutions were prepared using purified water (YAMATO, WR600A).

**Synthesis of oligodeoxynucleotides.** ODNs bearing disulfide bond were synthesized by the conventional phosphoramidite method using an Applied Biosystems 392 DNA/RNA synthesizer. Synthesized ODNs were purified by reversed phase HPLC on a Inertsil ODS-3 column (10 × 250 mm, elution with a solvent mixture of 0.1 M triethylammonium acetate (TEAA), pH 7.0, linear gradient over 40 min from 0% to 30% acetonitrile at a flow rate 3.0 mL/min). Mass spectra of ODNs purified by HPLC were determined with MALDI-TOF mass spectroscopy (acceleration voltage 21 kV, negative mode) with 2',3',4'-trihydroxyacetophenone as matrix, using T<sub>8</sub> ([M-H]<sup>-</sup> 2370.61) and T<sub>17</sub> ([M-H]<sup>-</sup> 5108.37) as an internal standard; **ODN 1**, 5'-dG-(CH<sub>2</sub>)<sub>6</sub>-SS-(CH<sub>2</sub>)<sub>6</sub>-dG-3', *m/z* 923.62 (calcd for [M-H]<sup>-</sup> 923.87); **ODN 2**, 5'-dA-(CH<sub>2</sub>)<sub>6</sub>-SS-(CH<sub>2</sub>)<sub>6</sub>-dA-3', *m/z* 891.33 (calcd for [M-H]<sup>-</sup> 891.87); **ODN 3**, 5'-dT-(CH<sub>2</sub>)<sub>6</sub>-SS-(CH<sub>2</sub>)<sub>6</sub>-dT-3', *m/z* 873.22 (calcd for [M-H]<sup>-</sup> 873.85); **ODN 4**, 5'-dC-(CH<sub>2</sub>)<sub>6</sub>-SS-(CH<sub>2</sub>)<sub>6</sub>-dC-3', *m/z* 842.83 (calcd for [M-H]<sup>-</sup> 843.82); **ODN 5**, 5'-dCATAGTGACG-(CH<sub>2</sub>)<sub>6</sub>-SS-(CH<sub>2</sub>)<sub>6</sub>-dGG-3', *m/z* 4038.08 (calcd for [M-H]<sup>-</sup> 4037.86); **ODN 6**, 5'-dGG-(CH<sub>2</sub>)<sub>6</sub>-SS-(CH<sub>2</sub>)<sub>6</sub>-dATTCTAGTTGAGAGC-3', *m/z* 5583.00 (calcd for [M-H]<sup>-</sup> 5583.84); **ODN 7**, 5'-dCTAAGTGACG-(CH<sub>2</sub>)<sub>6</sub>-SS-(CH<sub>2</sub>)<sub>6</sub>-dATTCTAGTTGAGAGCG-3', *m/z* 8039.61 (calcd for [M-H]<sup>-</sup> 8039.41).

**Radiolytic Reduction.** To establish hypoxia, aqueous solutions of **ODNs** ( $50 \mu\text{M}$ ) in 10 mM phosphate Na buffer (pH 7.0) containing 100 mM NaCl and 5 mM 2-methyl-2-propanol were purged with argon for 10 min and then irradiated in a sealed glass ampoule at ambient temperature with an X-ray source ( $5.0 \text{ Gy min}^{-1}$ ). After the irradiation, the solution was immediately subjected to HPLC or gel electrophoresis analysis.

For the PAGE analysis, the samples were loaded onto 20% polyacrylamide and 7 M urea sequencing gel and electrophoresed at 55 W for approximately 150 min. After the electrophoresis, the gel was stained with ethidium bromide ( $0.5 \mu\text{g/ mL}$ ). The gels were analyzed by autoradiography with the ATTO densitograph software library (version 3.0). The intensity of the spots was determined by volume integration to estimate the amount of products.

**Treatment of ODN by DTT.** Aqueous solution of ODN ( $50 \mu\text{M}$ ) was treated with 0.1 M dithiothreitol (DTT) in 50 mM phosphate buffer (pH 8.7) for 1 h at ambient temperature. After the reaction, the solution was immediately subjected to HPLC analysis.

**Melting Temperature ( $T_m$ ) Measurement.**  $T_m$ s of the duplexes (1  $\mu$ M, duplex concentration) were taken in a 10 mM phosphate Na (pH 7.0) containing 100 mM NaCl. Absorbance *vs* temperature profiles were measured at 260 nm using a JASCO V-530 UV/VIS spectrometer connected with ETC-505T temperature controller. The absorbance of the samples was monitored at 260 nm from 5 °C to 70 °C with a heating rate of 1 °C /min. From these profiles, first derivatives were calculated to determine  $T_m$  values.

**Table S1.** G-values ( $\mu\text{mol/J}$ ) for the formation of ODN Xa and ODN Xb in the radiolysis of ODNs 1-4 under hypoxic conditions

|                | Starting Material (ODN X) |       |       |       |
|----------------|---------------------------|-------|-------|-------|
|                | ODN 1                     | ODN 2 | ODN 3 | ODN 4 |
| Product ODN Xa | 2.42                      | 2.29  | 2.07  | 1.81  |
| Product ODN Xb | 2.13                      | 2.37  | 1.81  | 2.06  |

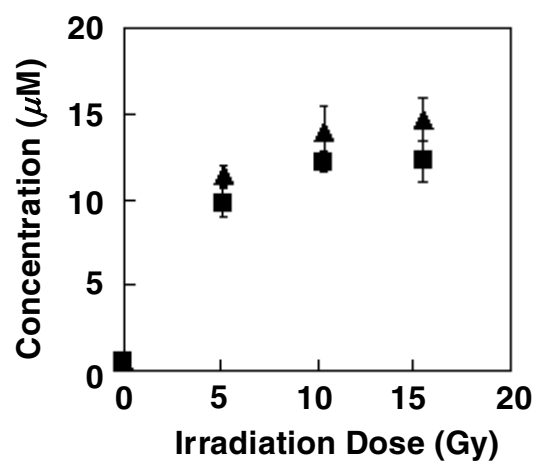

**Figure S1.** One-electron reduction of ODN 1 ( $50 \mu\text{M}$ ) in the X-radiolysis of Ar-purged aqueous solution containing 2-methyl-2-propanol (5 mM). Formation of ODN 1a (triangle); Formation of ODN 1b(square).

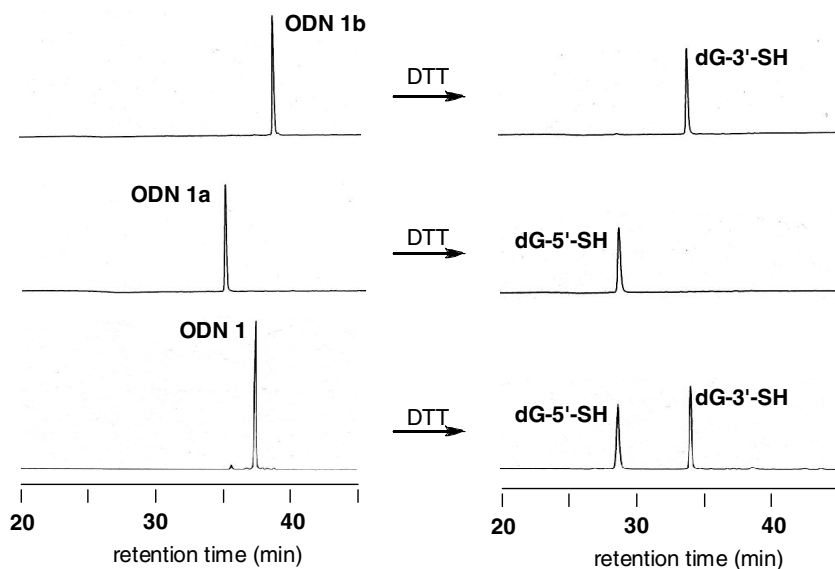

**Figure S2.** HPLC profiles for the treatment of ODN 1, ODN 1a and ODN 1b. Aqueous solutions of ODNs ( $50 \mu\text{M}$ ) were treated with  $0.1 \text{ M}$  dithiothreitol (DTT) in  $50 \text{ mM}$  phosphate buffer (pH 8.7) for  $1 \text{ h}$  at ambient temperature. ODN 1a and 1b produced their respective single products, which were dG-5'-SH and dG-3'-SH, respectively, as identified by the HPLC analysis with overlap injection of authentic samples prepared by treatment of ODN 1 with DTT.



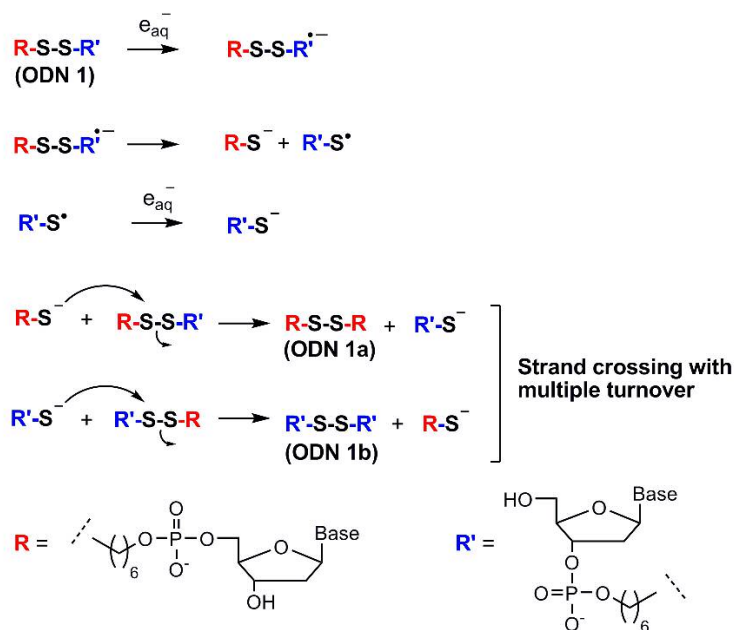

**Figure S3.** Plausible radiolytic reduction mechanism for efficient interexchange of disulfide bonds of dinucleotides.

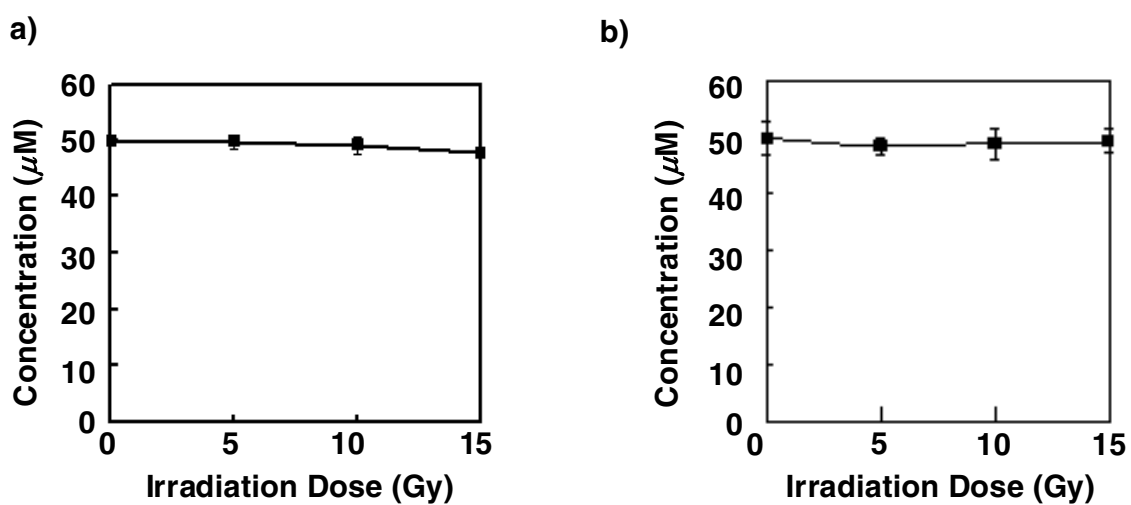

**Figure S4.** One-electron reduction of normal dinucleotides ( $50 \mu\text{M}$ ) in the X-radiolysis of Ar-purged aqueous solution containing 2-methyl-2-propanol (5 mM). a) Degradation of 5'-dTT-3'; b) Degradation of 5'-dGG-3'.

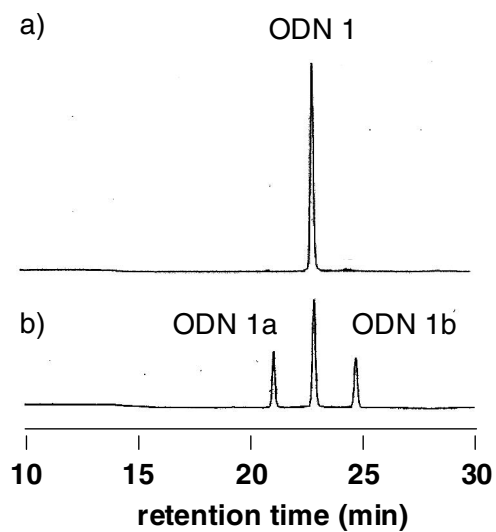

**Figure S5.** HPLC profiles for the one-electron reduction of ODN 1 ( $50 \mu\text{M}$ ) upon X-radiolysis of aqueous solution containing 2-methyl-2-propanol (5 mM) under anoxic conditions prepared by a freeze-thaw cycle techniques; a) before irradiation, b) after irradiation (15 Gy).
